# Supplementary material for: A porcine brain-wide RNA editing landscape
Source: PubMed Central journal article supplement (PMC8192503; doi:10.1038/s42003-021-02238-3), 2021-06-10
Supplement: 42003_2021_2238_MOESM3_ESM.pdf [file 42003_2021_2238_MOESM3_ESM.pdf]

## **Description of Additional Supplementary Files**

**File name:** Supplementary Data

**Description:**

*Supplementary Data 1:* List of all the 119 pig brain samples included in the analysis.

*Supplementary Data 2:* Sequencing information of whole genome sequencing data

*Supplementary Data 3a:* List of conserved editing sites in Cerebral Cortex.

*Supplementary Data 3b:* List of conserved editing sites in Amygdala.

*Supplementary Data 3c:* List of conserved editing sites in Hippocampal formation.

*Supplementary Data 3d:* List of conserved editing sites in Hypothalamus.

*Supplementary Data 3e:* List of conserved editing sites in Cerebellum.

*Supplementary Data 3f:* List of conserved editing sites in Spinal Cord.

*Supplementary Data 4:* List of samples obtained from GTEx Portal.
